# Supplementary material for: APC and P53 mutations synergise to create a therapeutic vulnerability to NOTUM inhibition in advanced colorectal cancer
Source: PubMed Central journal article supplement — Gut. 2023 Aug 17;72(12):2294–306. doi: 10.1136/gutjnl-2022-329140 (PMC10715527; doi:10.1136/gutjnl-2022-329140), 2023-08-17
Supplement: gutjnl-2022-329140supp004.pdf [file gutjnl-2022-329140supp004.pdf]

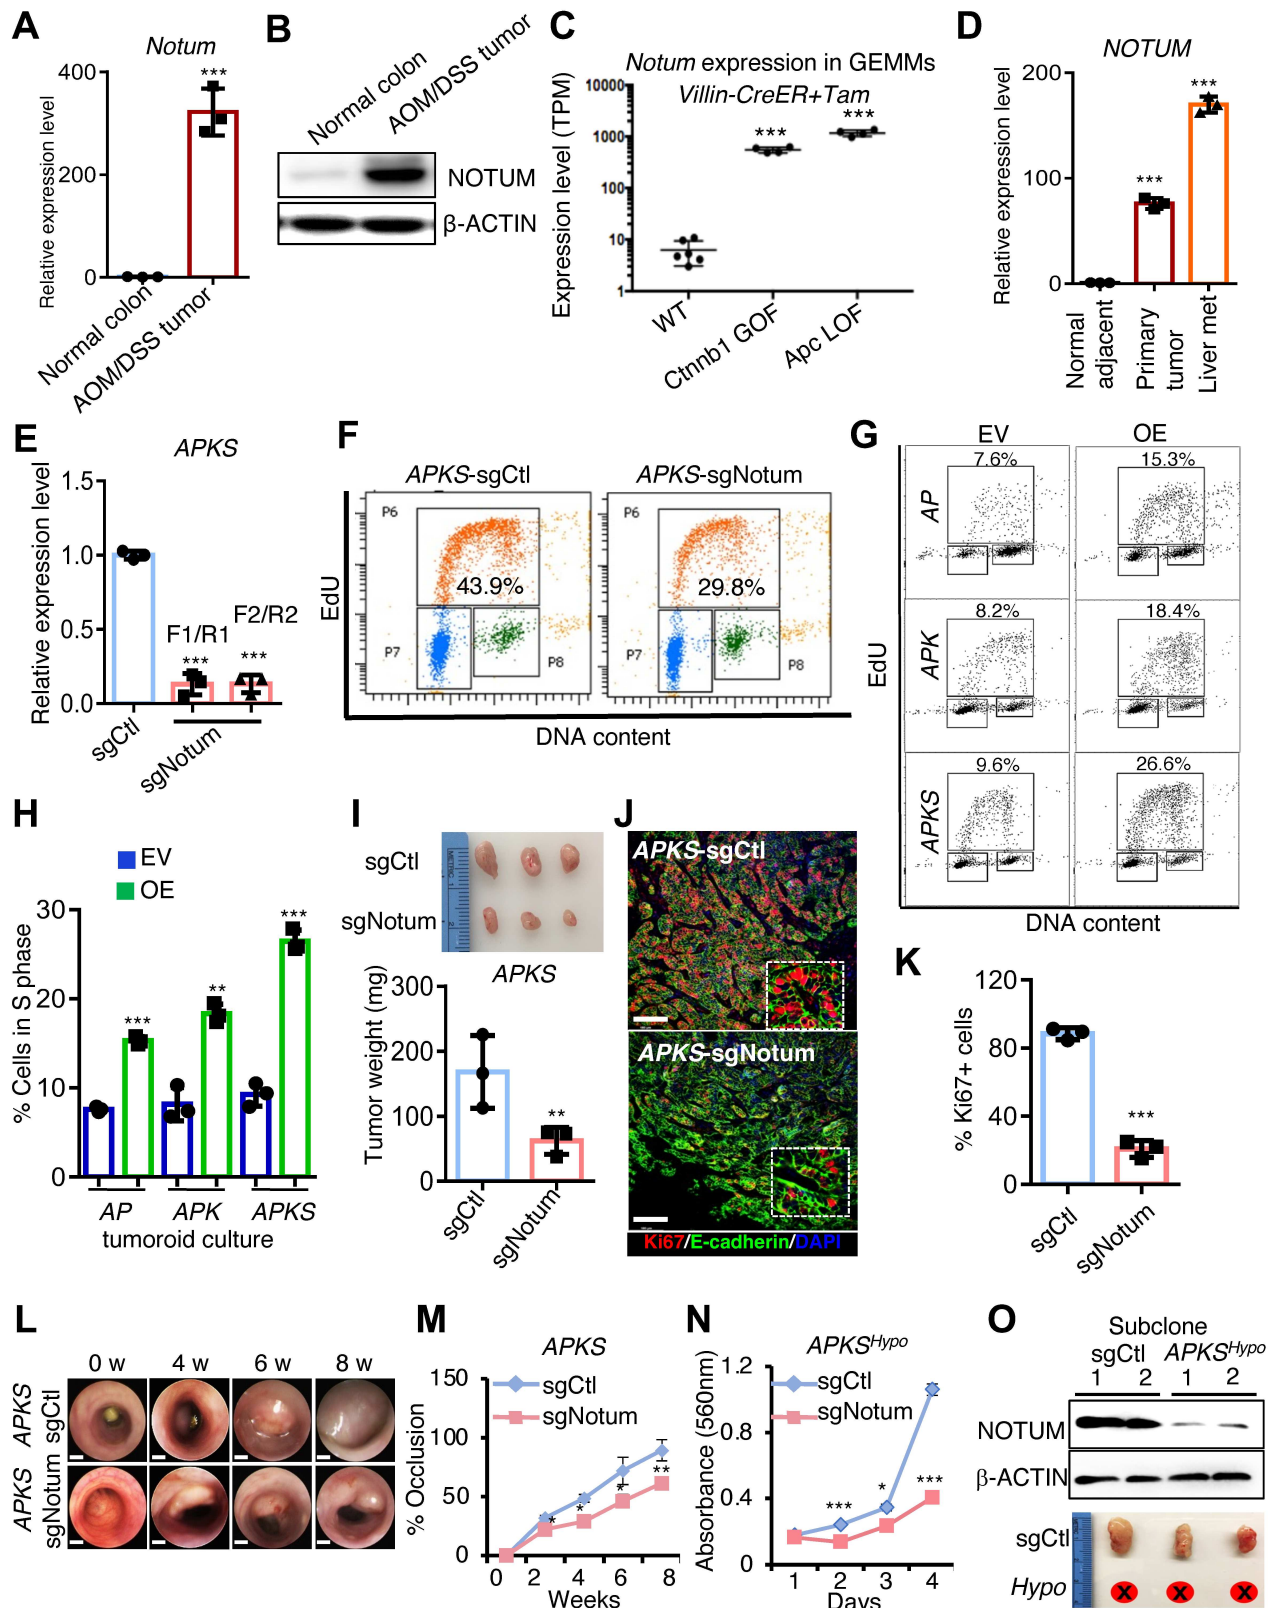

**Supplementary Figure 1. Notum is an obligate oncogene in advanced adenocarcinoma models.**

(A) Quantitative RT-PCR analysis of *Notum* expression in normal mouse colon epithelial cells and AOM/DSS carcinoma cells (n=3 biological replicates).

(B) NOTUM protein in normal colon mouse epithelial cells and AOM/DSS carcinoma cells.  $\beta$ -ACTIN was used as a loading control.

(C) Expression of *Notum* in colonic epithelium of *Ctnnb1<sup>exon3<sup>flx/flx</sup>::Villin-CreER</sup>* and *Apc<sup>flx/flx</sup>::VillinCreER* mice 5 days after tamoxifen-induced gene ablation, relative to controls (n=6 biological replicates).

(D) QRT-PCR for *NOTUM* in human primary colorectal adenocarcinoma, cognate liver metastasis, and normal adjacent tissue colon (n=6).

(E) Expression of *Notum* in mouse *APKS* tumoroids infected with control sgRNA (sgCtl) or *Notum* sgRNA (sgNotum) (n=3 technical replicates, with one representative of three independent experiments shown).

(F) Flow cytometric analysis of EdU incorporation in *APKS* tumoroids infected with control sgRNA (sgCtl) or *Notum* sgRNA (sgNotum) (n=3 technical replicates, with one representative of three independent experiments shown).

(G) Flow cytometric analysis of EdU incorporation in mouse *AP*, *APK* and *APKS* after infection with empty lentiviral vector (pUltra-EV) or vector overexpressing Notum (Notum OE) (n=3 technical replicates).

(H) Percentage of cells in S phase, from (G).

(I) Top: Subcutaneous tumors formed 4 weeks after implantation of mouse *APKS* tumoroids infected with control sgRNA (sgCtl) or *Notum* sgRNA (sgNotum) into syngeneic recipients (n=3 biological replicates). Bottom: Weight of tumors above.

(J) Immunofluorescence staining for KI67 and E-CADHERIN on tumors formed from subcutaneous *APKS* injection. Nuclei are visualized by DAPI staining (n=3 biological replicates). Scale bar: 100  $\mu$ m.

(K) Quantification of KI67+ cells in subcutaneous *APKS*-sgCtl and *APKS*-sgNotum mouse tumors.

(L) Representative endoscopic pictures showing the development of orthotopically implanted *APKS* tumors with control sgRNA (sgCtl) or *Notum* sgRNA (sgNotum) over 8 weeks of tumor growth (n=5 in sgCtl group, n=4 in sgNotum group). Scale bar: 2 mm.

(M) The percent of lumen occlusion was measured for each *APKS* tumor from (L) during the course of the experiment.

(N) MTT assays in a subclone of mouse *APKS* tumoroids infected with *Notum* sgRNA (sgNotum) and exhibiting hypomorphic NOTUM loss of function (*APKS<sup>Hypo</sup>*) (n=3 technical replicates).

(O) Top: Western blot analysis of mouse NOTUM protein in *APKS<sup>Hypo</sup>* subclone from (N).  $\beta$ -ACTIN was used as a loading control. Bottom: Subcutaneous tumor formation using the mouse Notum *APKS<sup>Hypo</sup>* line or control *APKS* mouse tumoroids.

For all panels: \* $P < 0.05$ , \*\* $P < 0.01$ , \*\*\* $P < 0.001$ , Student's *t*-test.

See supplemental figures 8 and 9 for validation of driver mutations, sgRNA knockdown, and overexpression.

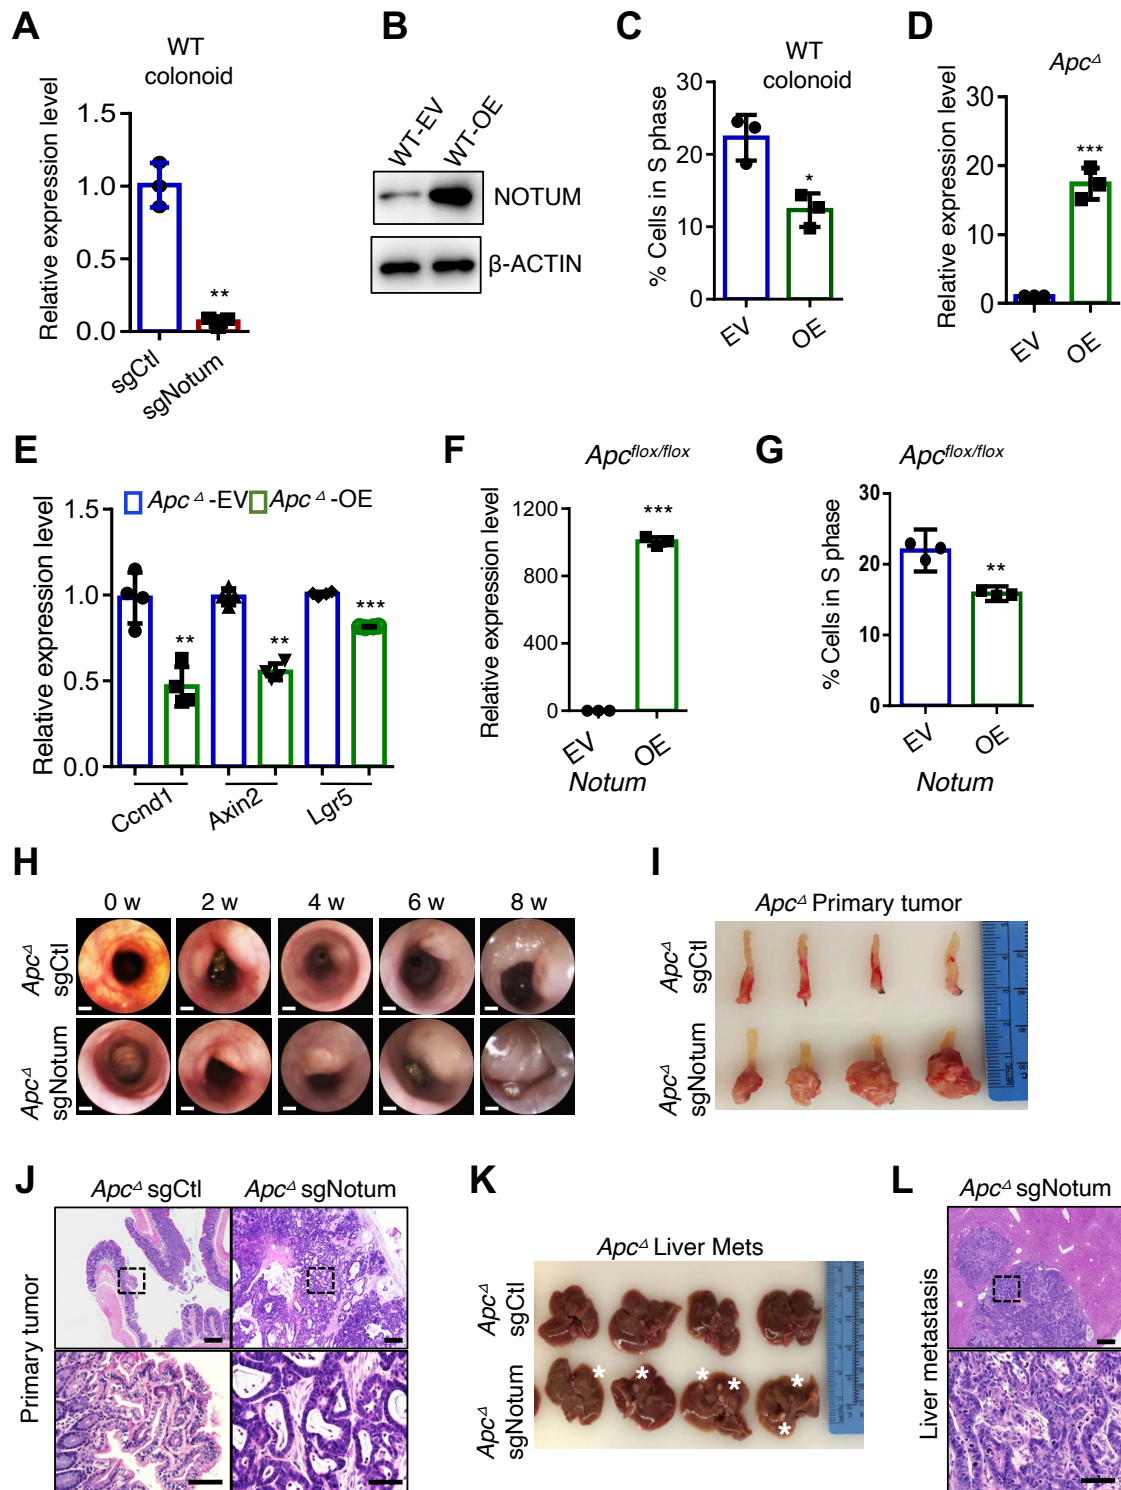

**Supplementary Figure 2. *Notum* maintains tumor suppressive activity upon APC inactivation.**

(A) Expression level of *Notum* in wildtype mouse organoids infected with control sgRNA (sgCtl) or *Notum* sgRNA (sgNotum) (n=3 technical replicates).

(B) Western blot analysis for NOTUM in wildtype mouse organoids infected with empty vector (EV) or *Notum* overexpression plasmid (OE).  $\beta$ -ACTIN was used as a loading control.

(C) The percentage of cells in S-phase (EdU+) in wildtype mouse organoids infected with empty vector (EV) or *Notum* overexpression plasmid (OE) (n=3 technical replicates).

(D) Expression level of *Notum* in *Apc* mutant mouse tumoroids infected with empty vector (EV) or vector overexpressing *Notum* (OE) (n=3 technical replicates).

(E) QRT-PCR for canonical Wnt/B-CATENIN pathway target genes in *Apc* mutant tumoroids from (D).

(F) Expression level of *Notum* in *Apc<sup>fllox/fllox</sup>::Villin-CreER* mouse colon tumoroids derived after tamoxifen treatment, infected with empty vector (EV) or vector overexpressing *Notum* (OE) (n=3 technical replicates with one representative of three independent experiments shown).

(G) The percentage of cells in S-phase (EdU+) in control or *Apc<sup>fllox/fllox</sup>::Villin-CreER* organoids (after *Apc* inactivation with 4OHT *in vitro*) infected with empty vector (EV) or *Notum* overexpressing vector from (F).

(H) Representative endoscopic pictures showing the development of orthotopic tumors formed in the distal colon by *Apc*-mutant tumoroids infected with control sgRNA (sgCtl) or *Notum* sgRNA (sgNotum) (n=4 biological replicates). Scale bar: 2 mm.

(I) Orthotopic primary tumors from (H).

(J) Hematoxylin and eosin micrographs from tumors in (I). Scale bar of top panels: 200  $\mu$ m. lower panels: 50  $\mu$ m.

(K) Livers of mice from (H), With white asterisks indicating macroscopically visible metastatic lesions.

(L) Hematoxylin and eosin micrographs from liver metastases in (K). Scale bar of top panel: 200  $\mu$ m. Lower panel: 50  $\mu$ m.

For all panels: \* $P < 0.05$ , \*\* $P < 0.01$ , \*\*\* $P < 0.001$ , Student's *t*-test. See supplemental figures 8 and 9 for validation of driver mutations, sgRNA knockdown, and overexpression.

**A**8-week-old *Lgr5<sup>CreERT2</sup>::Apc<sup>fl/fl</sup>* mice

TAM: 1mg o.d. d1-5

ABC99: 10 mg/kg o.d. d20-48

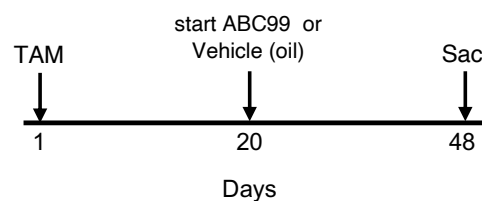**B**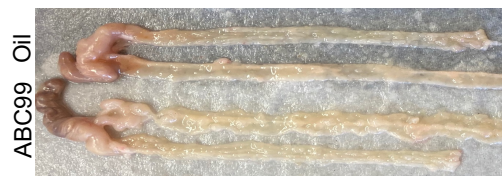**C**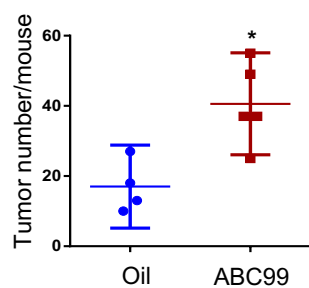**D**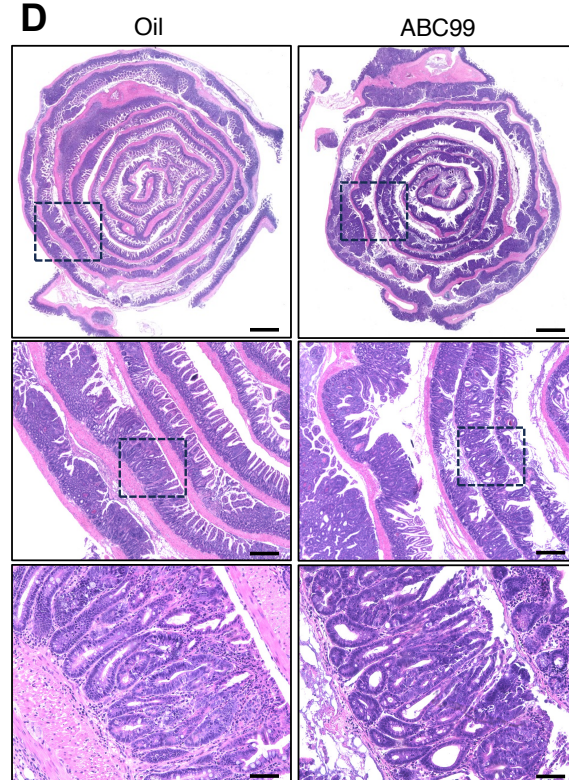**E**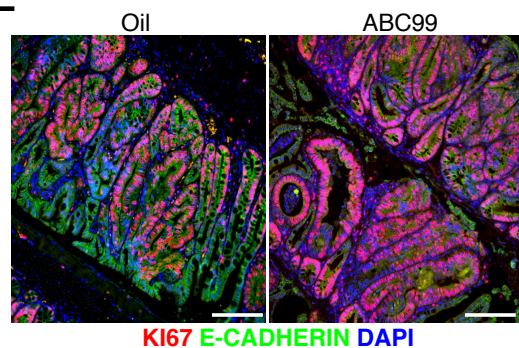

**Supplementary Figure 3. Pharmacological NOTUM inhibition in a mouse genetic model of adenoma driven by APC loss of function increases tumor burden.**

(A) Illustration depicting experimental approach for adenoma initiation by tamoxifen (TAM) administration to *Lgr5<sup>CreERT2</sup>::Apc<sup>flx/flx</sup>* mice followed by treatment with small molecule NOTUM inhibitor ABC99 (n=5) or vehicle control (n=4) twenty days later. ABC99 was administered daily for four weeks until the experimental endpoint.

(B) Intestine and colon tumors observed in *Lgr5<sup>CreERT2</sup>::Apc<sup>fl/fl</sup>* mice at the experimental endpoint, comparing ABC99-treated mice with oil-treated mice.

(C) Quantification of tumor numbers in the mice described in (B).

(D) Hematoxylin and eosin (H&E) staining of the tumors shown in (B). Scale bar: Top panel - 1000  $\mu\text{m}$ , middle panel - 200  $\mu\text{m}$ , bottom panel - 50  $\mu\text{m}$ .

(E) Ki67 staining of the tumors shown in (B). Scale bar: 100  $\mu\text{m}$ .

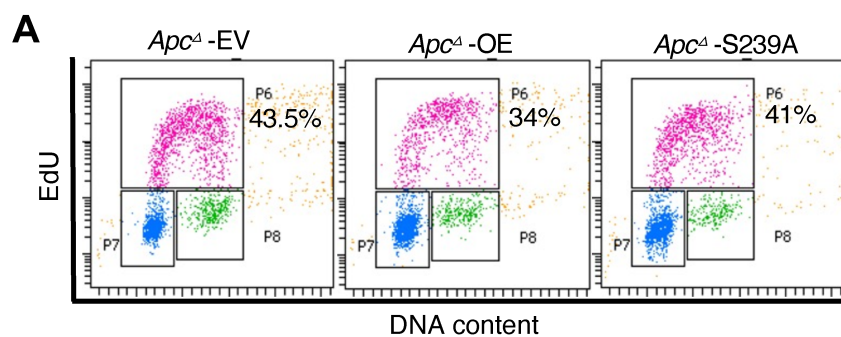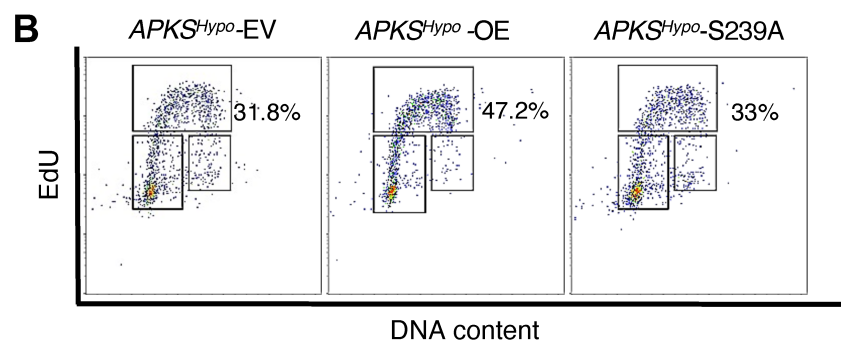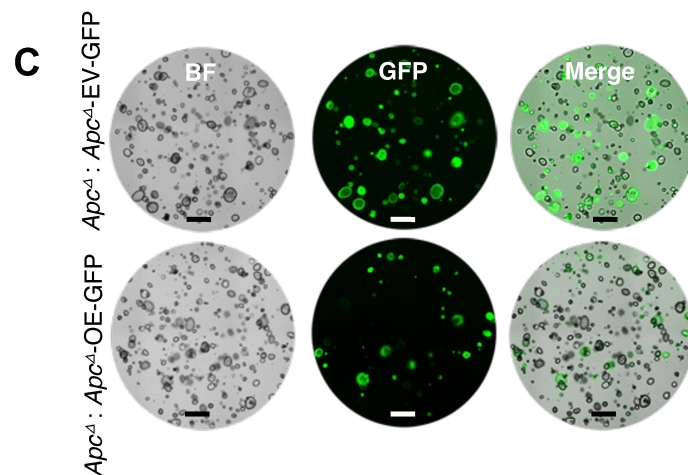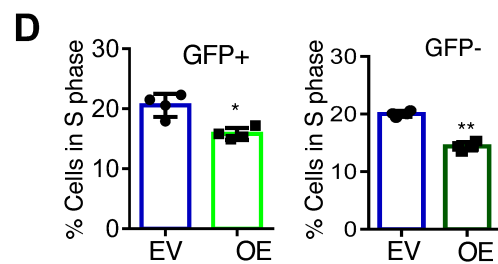

**Supplementary Figure 4. Novel tumor suppressive and oncogenic functions of NOTUM require extracellular enzymatic activity.**

(A) Representative flow cytometric plots of EdU incorporation after a 2-hour pulse, from Figure. 3A, C: *Apc* mutant mouse tumoroids infected with empty vector (EV), vector expressing wildtype NOTUM (OE), or catalytically dead NOTUM with Ser239Ala mutation (S239A) (n=3 technical replicates).

(B) Representative flow cytometric plots of EdU incorporation after a 2-hour pulse, from Figure. 3D, F: *APKS<sup>Hypo</sup>* mouse tumoroids infected with empty vector (EV), vector expressing wildtype NOTUM (OE), or catalytically dead NOTUM with Ser239Ala mutation (S239A) (n=3 technical replicates).

(C) Images of *Apc*-mutant mouse tumoroid co-cultures, with half of the tumoroids infected with either a vector expressing GFP only (EV-GFP) or expressing GFP and NOTUM (OE-GFP), and the other half uninfected (n=3 technical replicates). Scale bar: 100  $\mu$ m.

(D) EdU assays in the cultures in (C), quantifying the percentage of cells in S phase in the GFP+ and GFP-populations. \* $P < 0.05$ , \*\* $P < 0.01$ , Student's *t*-test. See supplemental figures 8 and 9 for validation of driver mutations, sgRNA knockdown, and overexpression.

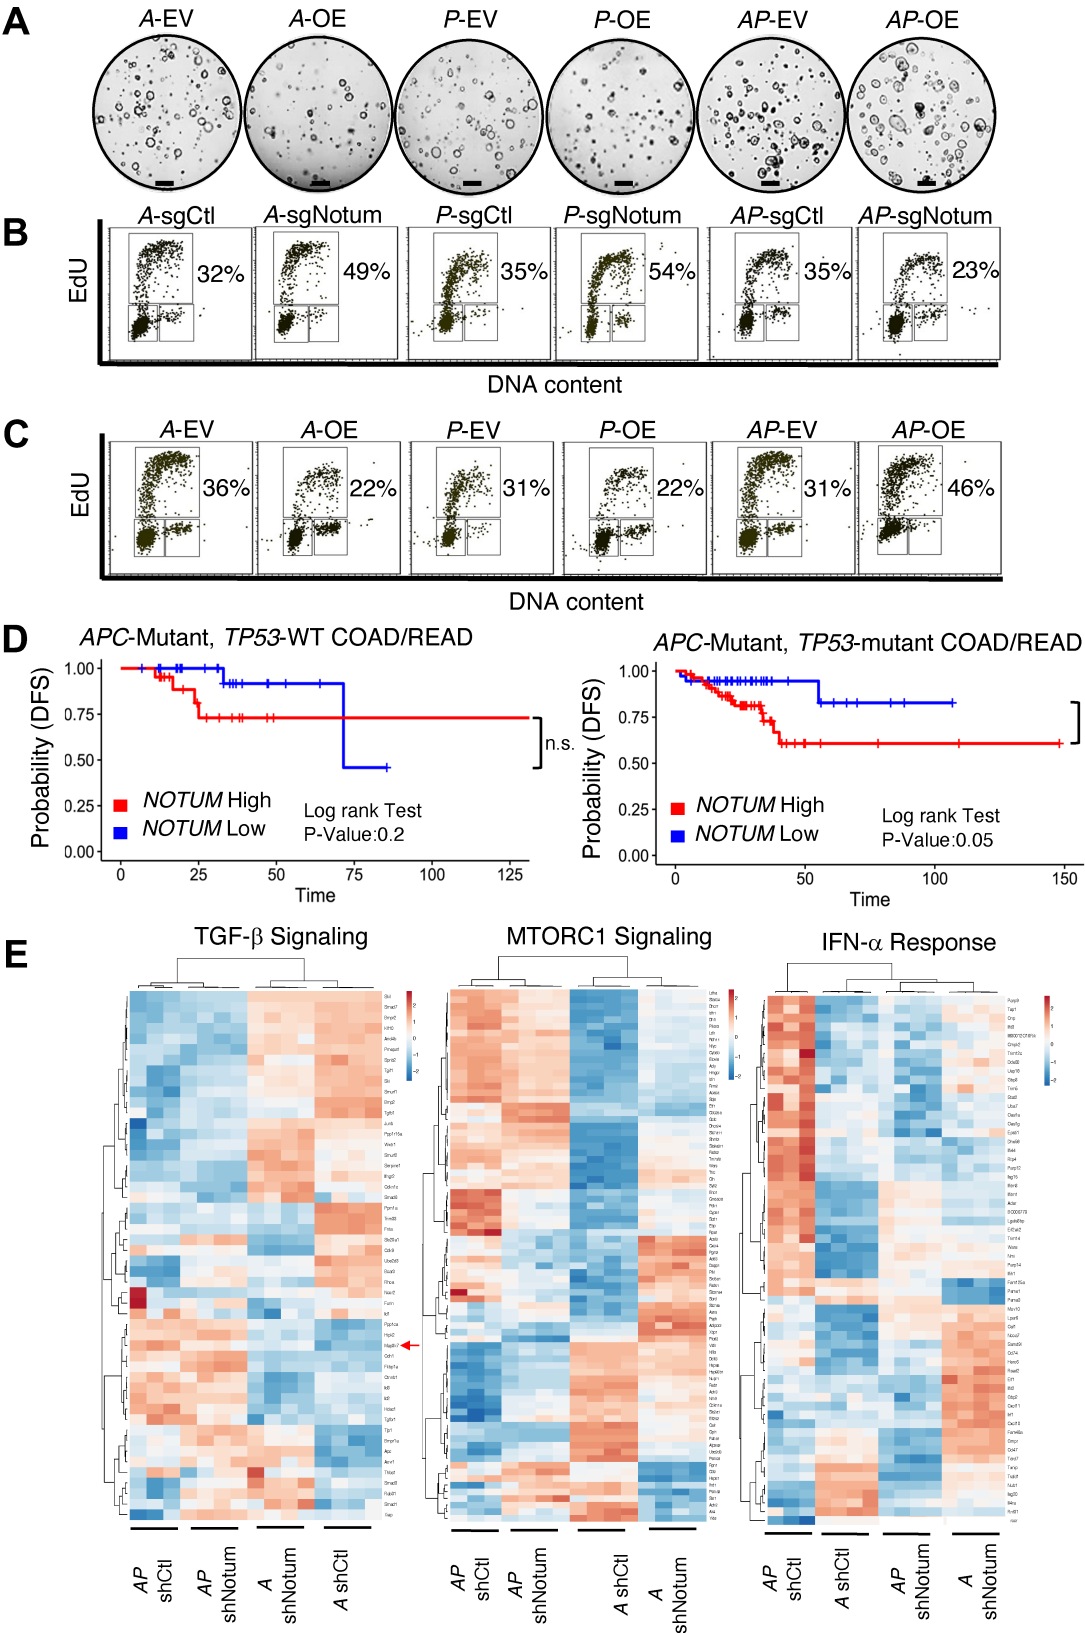

### Supplementary Figure 5. *Apc* and *Trp53* inactivation synergize to confer oncogenic activity upon NOTUM

(A) Brightfield image of *A*, *P* and *AP* mouse tumoroids infected with vector overexpressing NOTUM (OE) or empty vector control (EV) (n=3 technical replicates with one representative of three independent experiments shown). Scale bar: 100  $\mu$ m.

(B) Representative flow cytometric plots of EdU incorporation (measuring progression through S-phase) after a 2-hour pulse, from Fig. 4b, d: *Apc* (*A*), *Trp53* (*P*), or double mutant (*AP*) tumoroids infected with control sgRNA (sgCtl) or *Notum* sgRNA (sgNotum) (n=3 technical replicates with one representative of three independent experiments shown).

(C) Representative flow cytometric plots of EdU incorporation after a 2-hour pulse, from Fig. 4f and Extended Data Fig 5a: *A*, *P* and *AP* tumoroids infected with vector overexpressing NOTUM (OE) or empty vector control (EV) (n=3 technical replicates with one representative of three independent experiments shown).

(D) Analysis of disease-free survival (DFS) in human colon and rectal adenocarcinoma patients (COAD, READ) for which gene expression data is available in the Cancer Genome Atlas (TCGA). Left panel shows DFS for *APC* mutant, *TP53* wildtype patients (n=46), binned on *NOTUM* expression above (high) or below (low) the median. Right panel shows DFS for *APC/TP53* double mutant COAD/READ patients (n=93), binned on *NOTUM* expression above (high) or below (low) the median). \* $P<0.05$ , Student's t-test.

(E) Heatmaps showing gene expression in gene sets identified by gene set enrichment analysis for pathways affected by NOTUM loss of function in *A* or *AP* mouse tumoroids (related to main figure 4H, I). See supplemental figures 8 and 9 for validation of driver mutations, shRNA/sgRNA knockdown, and overexpression.

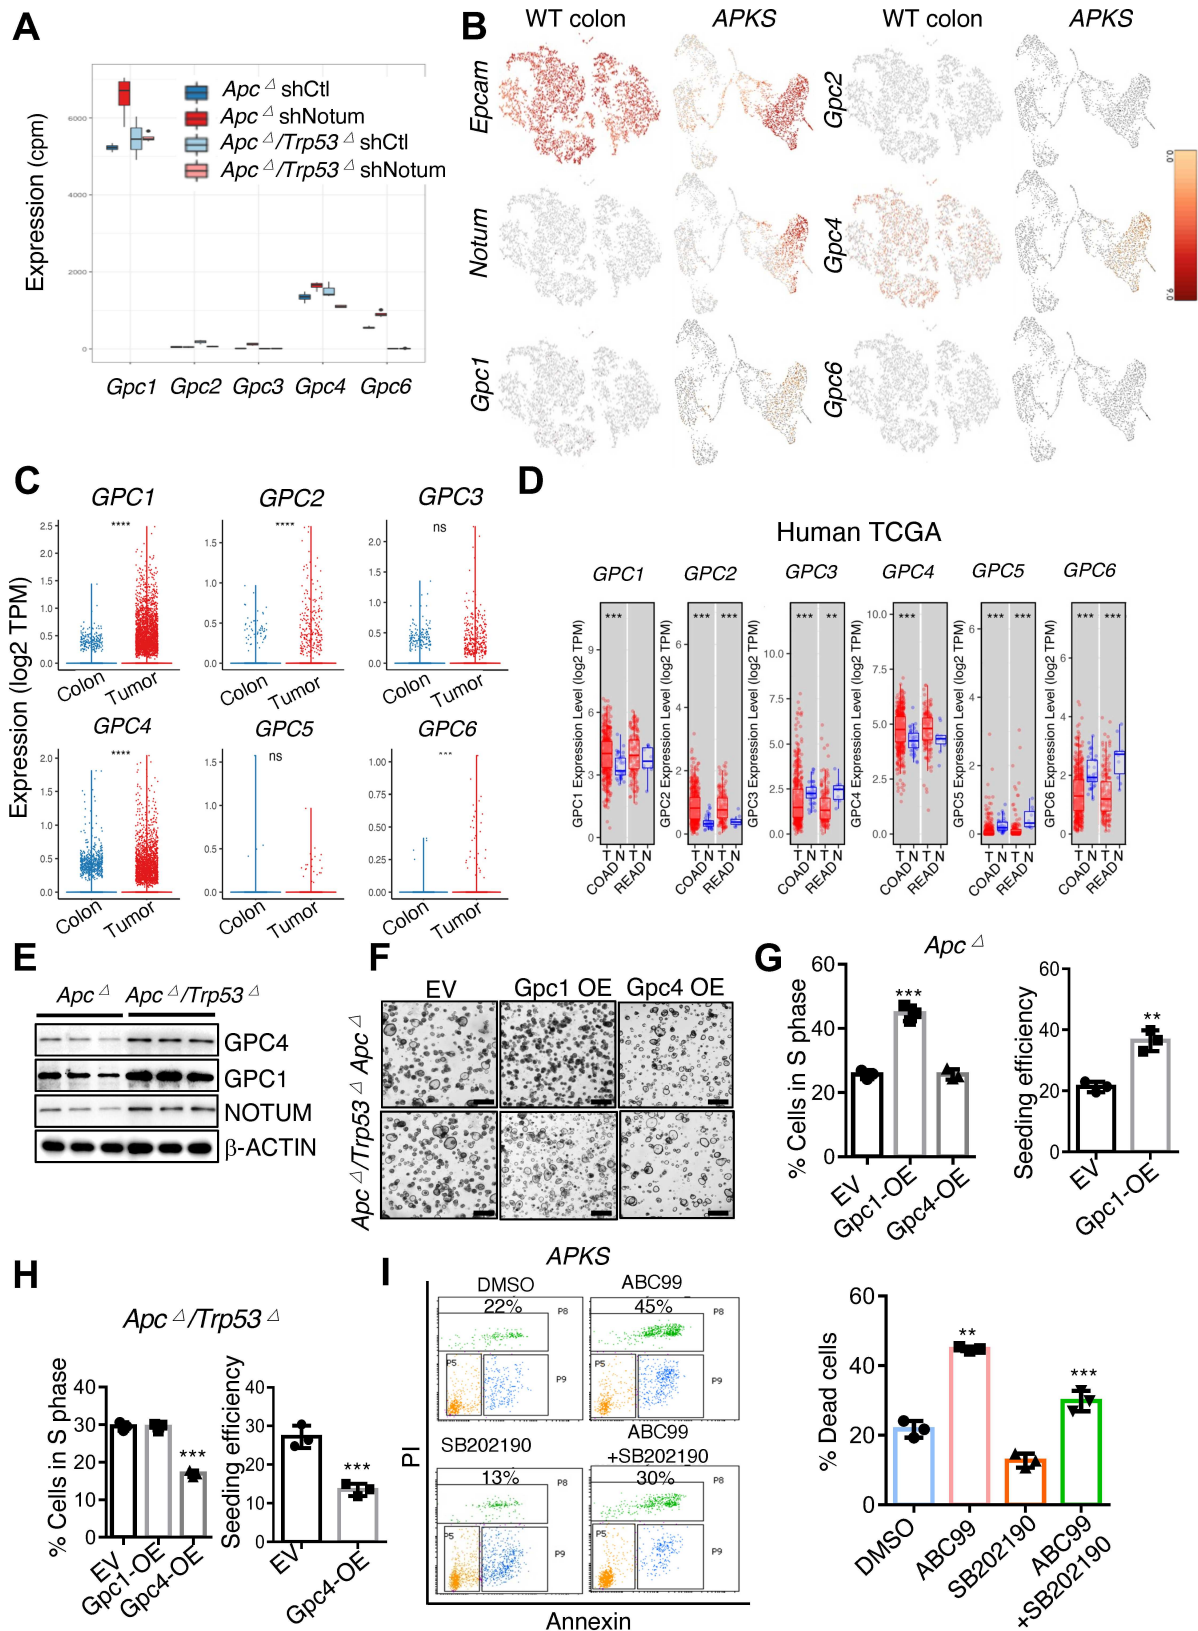

### Supplementary Figure 6. Glypicans as mediators of NOTUM function in adenoma and adenocarcinoma.

(A) Expression level of Glypicans *Gpc1*, *Gpc2*, *Gpc3*, *Gpc4* and *Gpc6* (*Gpc5* was not detected) in RNA sequencing data from *Apc* mutant (A) and *Apc/Trp53* double mutant (AP) mouse tumoroids infected with control shRNA (shCtl) or *Notum* shRNA (shNotum) (n=4 biological replicates).

(B) UMAP plots showing expression of *Epcam*, *Notum*, *Gpc1*, *Gpc2*, *Gpc4* and *Gpc6* in single cell RNA sequencing data from wildtype mouse colon epithelium and adenocarcinoma derived from orthotopic implantation of *APKS* mouse tumoroids into syngeneic mouse colonic mucosa.

(C) Expression level of Glypicans *GPC1*, *GPC2*, *GPC3*, *GPC4*, *GPC5*, and *GPC6* in single cell RNAseq data from primary human colorectal cancers and normal adjacent colon (n=17).

(D) Expression level of *GPC1*, *GPC2*, *GPC3*, *GPC4*, *GPC5* and *GPC6* in human TCGA colon (COAD) and rectum (READ) adenocarcinoma datasets.

(E) Western blotting for GPC1 and 4 in whole cell lysates from A and AP mouse tumoroids.  $\beta$ -ACTIN was used as a loading control.

(F) Brightfield image of A and AP mouse tumoroids infected with empty vector (EV) or vector expressing GPC1 (*Gpc1* OE) or GPC4 (*Gpc4* OE) (n=3 technical replicates). Scale bar: 100  $\mu$ m.

(G,H) EdU assays (left) and clonal seeding efficiencies (right) from *Apc* mutant (G) and *Apc/Trp53* double mutant (H) cultures shown in (f) (n=3 technical replicates).

(I) Quantification of apoptosis in *APKS* mouse tumoroid cultures after inhibition of NOTUM with the small molecule ABC99, the p38 inhibitor SB202190, or both (n=3 technical replicates).

For all panels: \*\*\*\* $P < 0.0001$ , \*\*\* $P < 0.001$ , \*\* $P < 0.01$ , Student's *t*-test. See supplemental figures 8 and 9 for validation of driver mutations, shRNA/sgRNA knockdown, and overexpression.

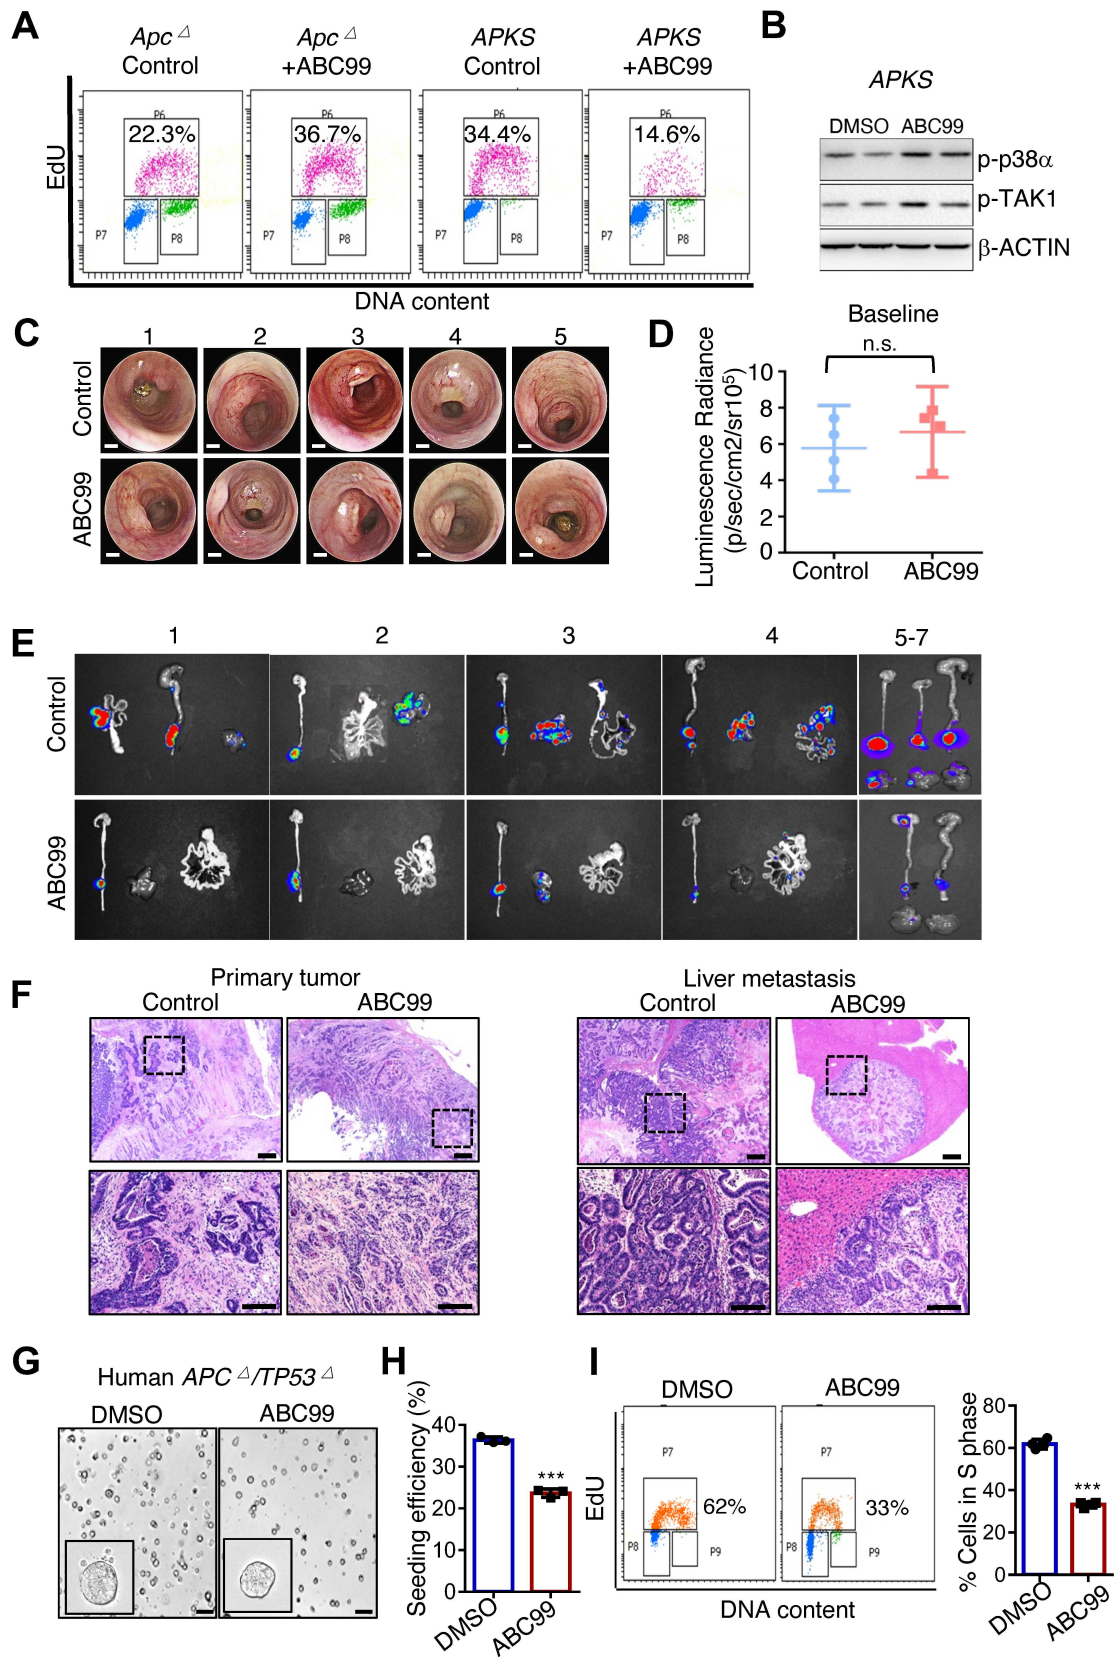

**Supplementary Figure 7. Pharmacological NOTUM inhibition is efficacious in a pre-clinical animal model of metastatic colon cancer.**

(A) Representative flow cytometric analysis of EdU incorporation in *Apc* mutant and APKS mouse tumoroids treated with the small molecule inhibitor of NOTUM, ABC99, or vehicle control (DMSO), quantified in Figure. 6A (n=3 technical replicates).

(B) Western blotting for phosphorylation of TAK1 and p38a in APKS tumoroids treated with vehicle or ABC99.  $\beta$ -ACTIN was used as a loading control.

(C) Representative endoscopic images of the orthotopic APKS tumors from Figure. 6B prior to initiation of treatment, 4 weeks post-implantation. Scale bar: 2 mm.

(D) Quantification of luminescence radiance from tumors in (C) after random assignment to groups and prior to initiation of treatment.

(E) Bioluminescence images of dissected intestine, colon, and livers of representative mice from Figure. 6C at experimental endpoint.

(F) Hematoxylin and Eosin-stained histological sections of representative primary tumors and liver metastases mice from Figure. 6C at the experimental endpoint. Scale bar of top panels: 200  $\mu$ m. Lower panels: 100  $\mu$ m.

(G) Brightfield micrographs of human colon cultures harboring loss-of-function mutations in *APC* and *TP53*, treated with ABC99 or vehicle control (n=3 technical replicates). Scale bar: 100  $\mu$ m.

(H) Clonal seeding efficiency from single cells from human cultures shown in (G). I. EdU incorporation assays in cultures shown in (G), quantified at right (n=3 technical replicates). For all panels: \*\*\* $P$ <0.001, Student's  $t$ -test. See supplemental figure 8 for validation of driver mutations.

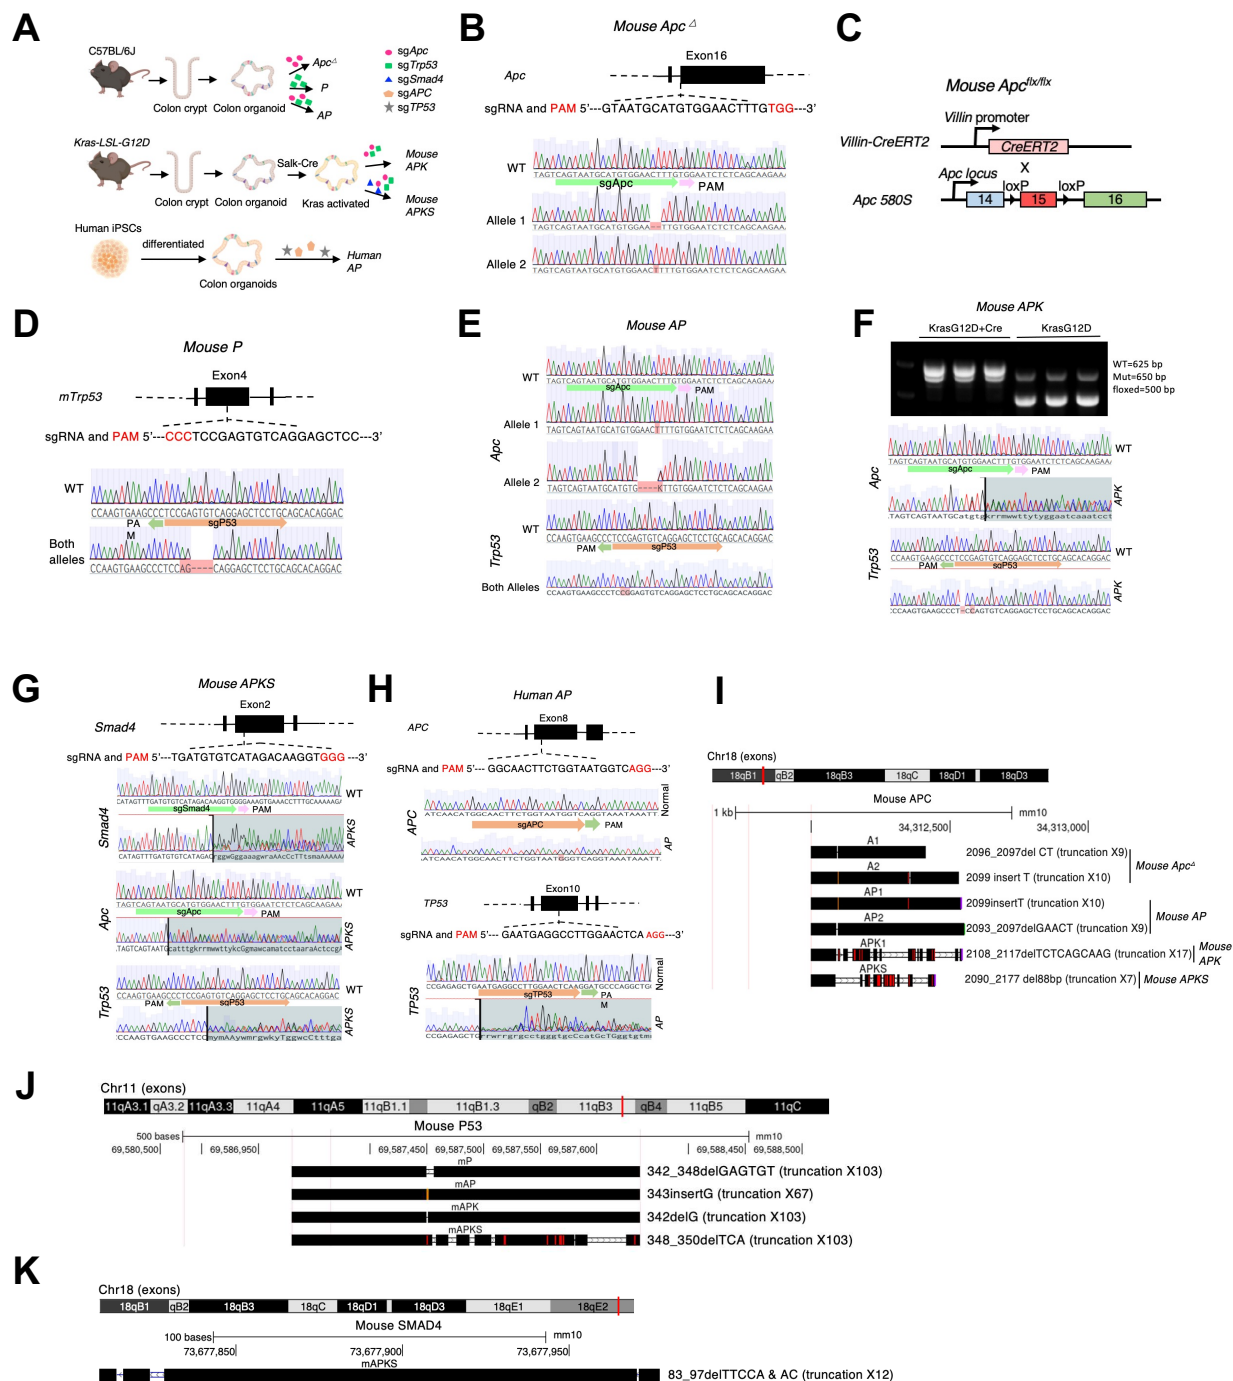

**Supplementary Figure 8. Genotypes of mouse and human models**

(A) Schematic representation of mouse and human organoid generation with corresponding mutations.

(B) Nucleotide sequences of targeted loci in mouse *Apc* observed in *A* organoids.

(C) Schematic representation of *Apc<sup>flx/flx</sup>* mouse model utilized in organoid experiments. The same *Apc<sup>flx/flx</sup>* allele is used for in vivo experiments, however *in vivo* *Lgr5<sup>CreER</sup>* is employed rather than *Villin-CreER*

(D) Nucleotide sequences of targeted loci in mouse *Trp53* observed in *P* organoids.

(E) Nucleotide sequences of targeted loci in mouse *Apc* and *Trp53* observed in *AP* organoids.

(F) PCR and nucleotide sequences of targeted loci in mouse *KrasG12D*, *Apc*, and *Trp53* detected in *APK* organoids.

(G) Nucleotide sequences of targeted loci in mouse *Apc*, *Trp53* and *Smad4* observed in *APKS* organoids.

(H) Nucleotide sequences of targeted loci in human *APC* and *TP53* identified in *AP* organoids.

(I) Truncation map of APC in mouse *Apc<sup>Δ</sup>*, *AP*, *APK* and *APKS* organoid.

(J) Truncation map of P53 in mouse *P*, *AP*, *APK* and *APKS* organoids.

(K) Truncation map of SMAD4 in mouse *APKS* organoids.

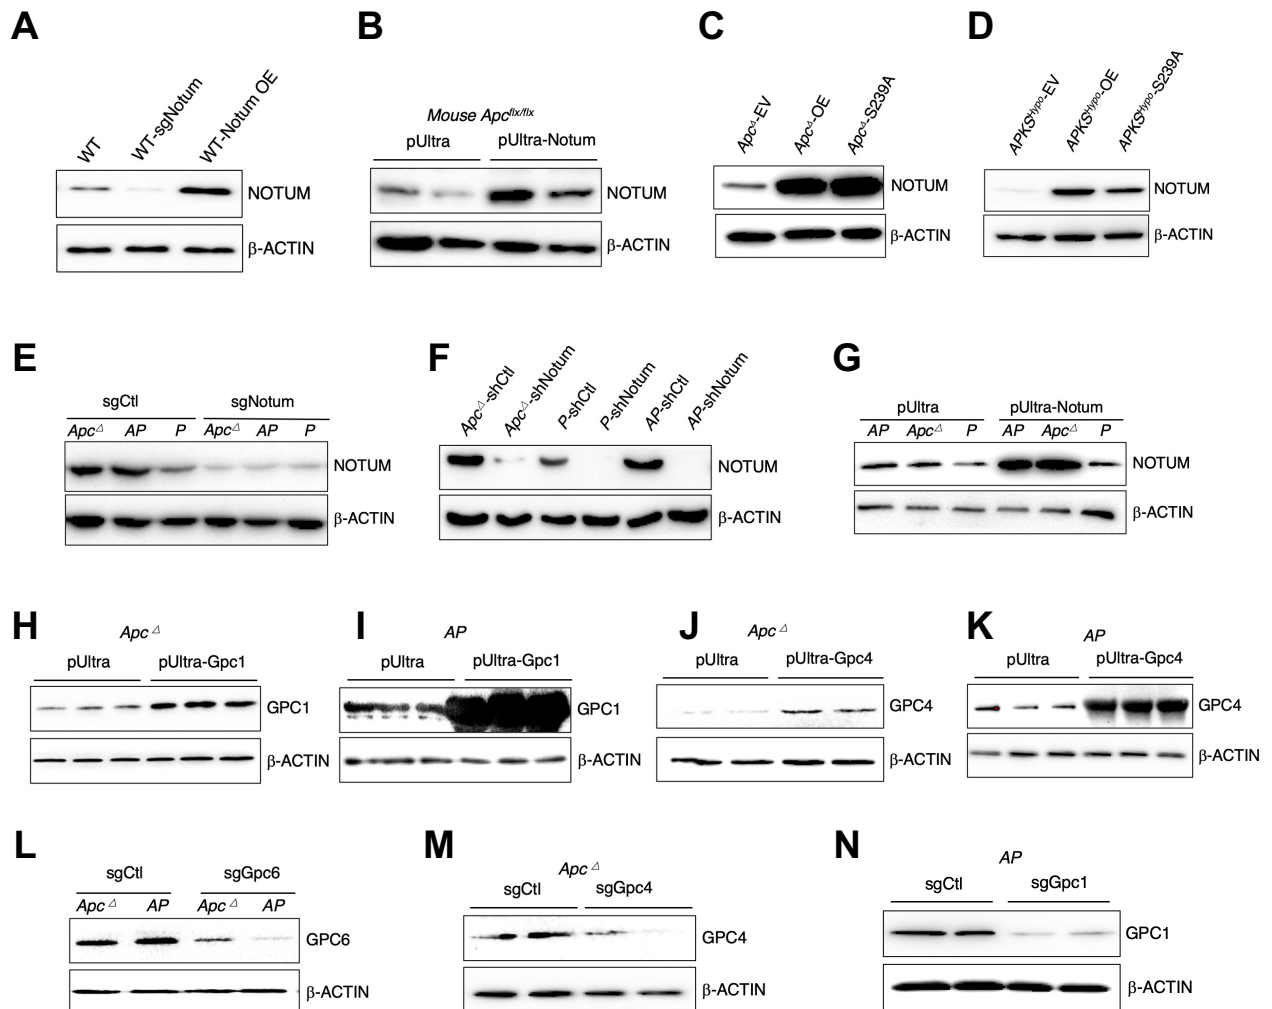

**Supplementary Figure 9. Validation of knockout/knockdown and overexpression in organoids.**

(A) NOTUM protein in WT mouse organoids infected with sgNotum and pUltra-Notum.  $\beta$ -ACTIN served as a loading control.

(B) NOTUM protein in *Apc<sup>flx/flx</sup>* mouse organoids infected with pUltra or pUltra-Notum, after *Apc* inactivation using *Villin-CreER* induction *in vitro*.  $\beta$ -ACTIN was used as a loading control.

(C) NOTUM protein in mouse *Apc<sup>d</sup>* organoids infected with pUltra(EV), pUltra-Notum (OE), or catalytically inactive Notum<sup>Ser239Ala</sup> (S239A).  $\beta$ -ACTIN was used as a loading control.

(D) NOTUM protein in mouse *APKS<sup>Hypo</sup>* organoids infected with pUltra, pUltra-Notum, or catalytically inactive Notum<sup>Ser239Ala</sup> (S239A).  $\beta$ -ACTIN served as a loading control.

(E) NOTUM protein in mouse *Apc<sup>d</sup>*, *P*, and *AP* organoids infected with sgCtl or sgNotum.  $\beta$ -ACTIN was used as a loading control.

(F) NOTUM protein in mouse *Apc<sup>d</sup>*, *P*, and *AP* organoids infected with shCtl or shNotum.  $\beta$ -ACTIN served as a loading control.

(G) NOTUM protein in mouse *Apc<sup>d</sup>*, *P*, and *AP* organoids infected with pUltra or pUltra-Notum.  $\beta$ -ACTIN was used as a loading control.

(H) GPC1 protein in mouse *Apc<sup>d</sup>* organoids infected with pUltra or pUltra-Gpc1.  $\beta$ -ACTIN served as a loading control.

(I) GPC1 protein in mouse *AP* organoids infected with pUltra or pUltra-Gpc1.  $\beta$ -ACTIN was used as a loading control.

(J) GPC4 protein in mouse *Apc<sup>d</sup>* organoids infected with pUltra or pUltra-Gpc4f.  $\beta$ -ACTIN served as a loading control.

(K) GPC4 protein in mouse *AP* organoids infected with pUltra or pUltra-Gpc4.  $\beta$ -ACTIN was used as a loading control.

(L) GPC6 protein in mouse *Apc<sup>d</sup>* and *AP* organoids infected with sgCtl or sgGpc6.  $\beta$ -ACTIN served as a loading control.

(M) GPC4 protein in mouse *Apc<sup>d</sup>* organoids infected with sgCtl or sgGpc4.  $\beta$ -ACTIN was used as a loading control.

(N) GPC1 protein in mouse *AP* organoids infected with sgCtl or sgGpc1.  $\beta$ -ACTIN served as a loading control.
